# Supplementary material for: Non-thermal plasma specifically kills oral squamous cell carcinoma cells in a catalytic Fe(II)-dependent manner
Source: PubMed Central journal article supplement (PMC6667380; doi:10.3164/jcbn.18-91), 2019-06-01
Supplement: jcbn18-91sf01.pdf [file jcbn18-91sf01.pdf]

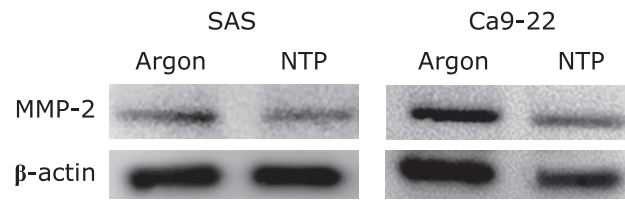

**Supplemental Fig. 1.** Non-thermal plasma (NTP) inhibits the tumor invasive activity of cancer cells. Matrix metalloproteinase-2 (MMP-2) was used to assess the invasive activity of cancer cells after the application of NTP. The protein level of MMP-2 was decreased in the NTP group compared with the Argon group.
